# Supplementary material
Source: PubMed Central journal article supplement (PMC5546919)
Supplement: NIHMS250535-supplement-1_si_001.pdf [file NIHMS250535-supplement-1_si_001.pdf]

# Bioinspired Total Synthesis and Human Proteasome Inhibitory Activity of (–)-Salinosporamide A, (–)-Homosalinosporamide A, and Derivatives Obtained via Organonucleophile Promoted Bis-Cyclizations

Henry Nguyen,<sup>†</sup> Gil Ma,<sup>‡,†</sup> Tatiana Gladysheva,<sup>§</sup> Trisha Fremgen,<sup>§</sup> and Daniel Romo<sup>†,\*</sup>

<sup>†</sup>Department of Chemistry, Texas A&M University, P.O. Box 30012, College Station, Texas 77842-3012;

<sup>§</sup>Genzyme Corporation, Drug and Biomaterial R & D, 153 Second Avenue, Waltham, MA 02451

## Supporting Information

**Supporting Information Available.** General procedures and characterization data including <sup>1</sup>H and <sup>13</sup>C NMR spectra (for compounds **1a'**, **21e**, **44**, **45**, **61**, **63**) and X-ray analysis (**61**, **1a'**). This material is available free of charge *via* the Internet at <http://pubs.acs.org>

|                                                                                      |        |
|--------------------------------------------------------------------------------------|--------|
| Experimental Procedures                                                              | S2-S8  |
| X-ray (ORTEP) structure of <i>rac</i> -phenyl salinosporamide A, (±)- <b>61</b>      | S7     |
| X-ray (ORTEP) structure of C5, C6-bis- <i>epi</i> -salinosporamide A (–)- <b>1a'</b> | S9     |
| <sup>1</sup> H and <sup>13</sup> C NMR spectra                                       | S10-21 |

Note: All procedures and characterization data associated with the synthesis of *rac*-cinnabaramide,<sup>1</sup> *rac*-salinosporamide,<sup>1</sup> (+)-salinosporamide,<sup>2</sup> and (+)-homosalinosporamide<sup>2</sup> have been published previously.

<sup>1</sup> See Supporting Information in: Ma, G.; Nguyen, H.; Romo, D. *Org. Lett.* **2007**, *9*, 2143.

<sup>2</sup> See Supporting Information in: Nguyen, H.; Ma, G.; Romo, D. *Chem. Comm.* **2010**, *46*, 4803.

### General Procedures:

All reactions were carried out under nitrogen atmosphere in oven-dried glassware. Dichloromethane, toluene and ethyl ether were purified by passage through activated molecular sieves. Methanol was distilled from magnesium turnings. Tetrahydrofuran was distilled from Na/benzophenone. Hünig's base and triethylamine were distilled from CaH<sub>2</sub> prior to use. All other commercially obtained reagents were used as received unless noted otherwise. *O*-Benzyl-*D*-serine was purchased from Chem-impex International. Flash column chromatography was performed using 60Å Silica Gel (Silicycle, 230-400 mesh) as a stationary phase. Diastereomeric ratios were determined by integration (<sup>1</sup>H NMR, 500 MHz). Mass spectra were obtained at the Laboratory for Biological Mass Spectrometry (Texas A&M University). Thin layer chromatography (TLC) was performed using glass-backed silica gel 60<sub>F254</sub> (Silicycle, 250 μm thickness).

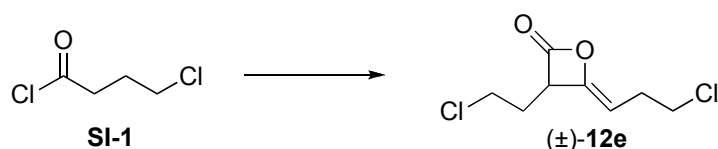

**Homoketene dimer, (±)-12e:** To a solution of 4-chlorobutyrylchloride (**SI-1**) (5.64 mL, 0.05 mol) in Et<sub>2</sub>O (50 mL) was added triethylamine (8.4 mL, 0.06 mol) via a syringe pump at 23 °C for a period of 1 h. During addition of triethylamine, a salt precipitated as a white solid. After stirring for an additional 90 min, the reaction mixture was diluted with hexanes (75 mL), filtered through a pad of SiO<sub>2</sub> via a fritted funnel, and then the pad of SiO<sub>2</sub> was washed with 200 mL of 40% Et<sub>2</sub>O/hexanes. The combined filtrates were concentrated under reduced pressure and the residue was purified by flash chromatography (95:5 pentane/Et<sub>2</sub>O) gave ketene dimer (±)-**12e** (2.25 g, 43 %) as a colorless oil. *R<sub>f</sub>* = 0.29 (90% pentane/ether); IR (neat) 1874, 1726 cm<sup>-1</sup>; <sup>1</sup>H NMR (500 MHz, C<sub>6</sub>D<sub>6</sub>) δ 4.20 (t, *J* = 7.0 Hz, 1H), 3.36 (t, *J* = 7.0 Hz, 1H), 2.98-3.01 (m, 2H), 2.92-2.96 (m, 1H), 2.86-2.90 (m, 1H), 2.09-2.21 (m, 2H), 1.30-1.45 (m, 2H); <sup>13</sup>C NMR (125 MHz, C<sub>6</sub>D<sub>6</sub>) δ 167.7, 147.3, 98.2, 51.7, 44.1, 41.4, 30.4, 28.5; LRMS (EI) Calcd. for C<sub>16</sub>H<sub>28</sub>O<sub>2</sub> [*M*<sup>+</sup>] 208, found 208. Satisfactory HRMS could not be obtained for this compound by MALDI or ESI.

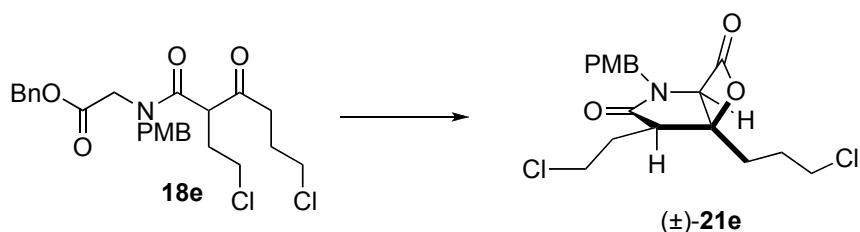

**β-lactone, (±)-21e:** To a suspension of *N*-propyl-2-bromo pyridinium triflate (130 mg, 0.371 mmol) and 4-pyrrolidinopyridine (53 mg, 0.371 mmol) in CH<sub>2</sub>Cl<sub>2</sub> (6 mL) was added Hünig's base (63 μL, 0.494 mmol) at 0 °C. After stirring for 10 min, a solution of the crude keto-acid from hydrogenolysis (100 mg, 0.247mmol) in CH<sub>2</sub>Cl<sub>2</sub> (4 mL) was added via syringe pump over 1 h at 0 °C. The resulting suspension was

stirred for 2 h at 0 °C. The crude reaction mixture was diluted with Et<sub>2</sub>O (70 mL) and washed with aqueous NH<sub>4</sub>Cl solution and brine (30 mL of each). The organic layer was dried over MgSO<sub>4</sub>, filtered, and concentrated. The residue was purified by flash chromatography (1:10 EtOAc/hexanes) to give a mixture of  $\beta$ -lactones **21e/21e'** (67 mg, 70%, dr 4:1) as a colorless oil. ( $\pm$ )-**21e** (major diastereomer): *R<sub>f</sub>* = 0.66 (40% EtOAc/hexanes); IR (neat) 1832, 1702 cm<sup>-1</sup>; <sup>1</sup>H NMR (500 MHz, CDCl<sub>3</sub>)  $\delta$  7.22 (d, *J* = 14.5 Hz, 2H), 6.90 (d, *J* = 14.5 Hz, 2H), 5.05 (d, *J* = 24.5 Hz, 1H), 4.45 (s, 1H), 4.02-4.10 (m, 1H), 4.06 (d, *J* = 24.5 Hz, 1H), 3.82 (s, 3H), 3.73-3.81 (m, 1H), 3.49-3.62 (m, 2H), 2.98 (t, *J* = 12 Hz, 1H), 2.26-2.40 (m, 1H), 2.05-2.24 (m, 3H), 1.84-1.93 (m, 2H); <sup>13</sup>C NMR (125 MHz, CDCl<sub>3</sub>)  $\delta$  173.1, 165.1, 159.6, 130.1(2C), 126.3, 114.4(2C), 81.4, 68.9, 53.3, 45.3, 43.8, 43.7, 42.4, 32.4, 29.0, 26.6; LRMS (ESI) Calcd. for C<sub>18</sub>H<sub>22</sub>Cl<sub>2</sub>NO<sub>4</sub> [M+H] 386, found 386.

**Cyclopropyl Ketoamide 44:** *R<sub>f</sub>* = 0.29 (95% DCM/EtOAc); IR (neat) 1759, 1697 cm<sup>-1</sup>; (500 MHz, CDCl<sub>3</sub>)  $\delta$  7.30-7.38 (m, 3H), 7.24-7.26 (m, 2H), 7.15 (d, *J* = 9Hz, 2H), 6.83 (d, *J* = 9Hz, 2H), 5.18 (d, *J* = 14.5 Hz, 1H), 4.46 (d, *J* = 12 Hz, 1H), 4.37 (d, *J* = 12 Hz, 1H), 4.08 (d, *J* = 14.5 Hz, 1H), 3.87 (t, *J* = 3.0 Hz, 1H), 3.79 (s, 3H), 3.74 (dd, *J* = 10, 3 Hz, 1H), 3.70 (dd, *J* = 10, 3 Hz, 1H), 1.76 (d, *J* = 9.5 Hz, 1H), 1.73 (d, *J* = 9.5 Hz, 1H), 1.64 (dd, *J* = 9.5, 5 Hz, 1H), 1.56(dd, *J* = 9.5, 5 Hz, 1H); <sup>13</sup>C NMR (125 MHz, CDCl<sub>3</sub>)  $\delta$  208.0, 172.8, 159.5, 137.7, 129.9 (2C), 128.7 (2C), 128.2 (2C), 127.9 (2C), 114.4(2C), 73.5, 66.8, 65.2, 55.6, 44.0, 32.0, 21.7, 20.8; HRMS (ESI) Calcd. for C<sub>22</sub>H<sub>23</sub>NO<sub>4</sub>Li [M+Li] 372.1787, found 372.1786.

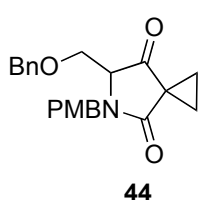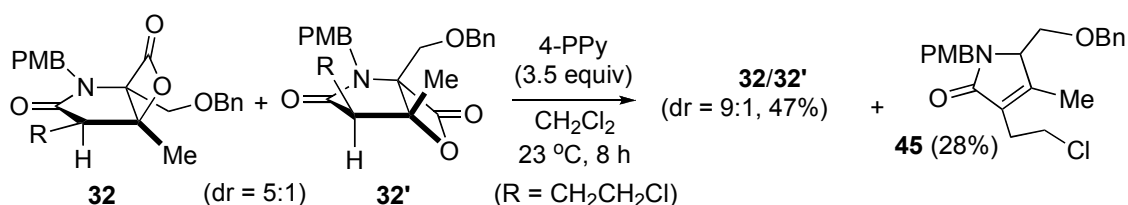

**Decomposition of  $\beta$ -lactones **32/32'** Leading to Unsaturated Lactam **45.** To a mixture of  $\beta$ -lactones (16 mg, 0.036 mmol, dr 5:1) in 1.5 mL CH<sub>2</sub>Cl<sub>2</sub> was added 4-pyrrolidinopyridine (18 mg, 0.126 mmol) at 23 °C. After 8 h, the reaction mixture was diluted with ether (25 mL) and washed with 20 % CuSO<sub>4</sub> solution (20 mL) to remove the majority of the 4-pyrrolidinopyridine and this was followed by washing with saturated NH<sub>4</sub>Cl (20 mL), and then water (2 x 20 mL). The organic layer was dried over MgSO<sub>4</sub>, filtered, and concentrated. The residue was purified by flash chromatography (1:9  $\rightarrow$  3:7 EtOAc/hexanes) to give a mixture of recovered  $\beta$ -lactones **32/32'** (7.5 mg, 47%, 9:1 dr) and unsaturated  $\gamma$ -lactam **45** (4.5 mg, 31%): *R<sub>f</sub>* = 0.26 (95% DCM/EtOAc); IR (neat) 1682, 1513 cm<sup>-1</sup>; <sup>1</sup>H NMR (500 MHz, CDCl<sub>3</sub>)  $\delta$  7.35-7.38 (m, 2H), 7.31-7.33 (m, 1H), 7.26-7.28 (m, 2H), 7.10 (d, *J* = 9Hz, 2H), 6.80 (d, *J* = 9Hz, 2H), 5.03 (d, *J* = 15 Hz, 1H), 4.45 (d, *J* = 12 Hz, 1H), 4.41 (d, *J* = 12 Hz, 1H), 4.17 (d, *J* = 15 Hz, 1H), 3.85 (t, *J* = 4.5,**



resuspended in water (50 mL) and acidified to pH 3 with 2 N HCl. The precipitated white solid was filtered via a Büchner funnel, washed with ice-cold water (2 x 30 mL) and ice-cold Et<sub>2</sub>O (2 x 30 mL), and dried under vacuum to give *O*-benzyl-*N*-PMB serine (6.80 g, 97 %) as a white solid.

To *O*-benzyl-*N*-PMB serine (6.80 g, 21.6 mmol) and *p*-TsOH (4.93 g, 25.9 mmol) was added allyl alcohol (20 mL) and benzene (40 mL). The solution was stirred at reflux (~ 100 °C) with a Dean-Stark apparatus until the calculated amount of water had been collected (~ 8 h). The resulting solution was concentrated, resuspended in 5% aqueous NaHCO<sub>3</sub> (120 mL), and extracted with EtOAc (500 mL). The pH was adjusted to 10.0 (until pH of aqueous solution maintained at 10 after extraction) with 2 M NaOH solution. The organic layer was washed with brine, dried over MgSO<sub>4</sub>, and concentrated under reduced pressure. The residue was purified by flash chromatography (1:6 EtOAc/hexanes) to give the desired allyl ester (+)-**23b** (6.30 g, 82%) as a yellow oil. *R<sub>f</sub>* = 0.61 (33% EtOAc/hexanes); [α]<sup>23</sup><sub>D</sub> = + 20.6 (*c* = 1.8, CHCl<sub>3</sub>); IR (neat) 1738, 1612 cm<sup>-1</sup>; <sup>1</sup>H NMR (500 MHz, CDCl<sub>3</sub>) δ 7.25-7.35 (m, 7 H), 6.90 (d, *J* = 8.5 Hz, 2H), 5.87-5.95 (m, 1 H), 5.22-5.35 (m, 2 H), 4.69 (dt, *J* = 1.2, 5.7 Hz, 2H), 4.58 (d, *J* = 12.3 Hz, 1H), 4.53 (d, *J* = 12.0 Hz, 1H), 3.89 (d, *J* = 12.6 Hz, 1H), 3.82 (s, 3H), 3.70-3.82 (m, 2H), 3.71 (d, *J* = 13.2 Hz, 1H), 3.57 (t, *J* = 4.8 Hz, 1H), 2.28 (s, 1H); <sup>13</sup>C NMR (125 MHz, CDCl<sub>3</sub>) δ 173.1, 158.9, 138.1, 132.2, 131.9, 129.8 (2C), 128.6 (2C), 127.9, 127.8(2C), 118.7, 114.0 (2C), 73.4, 71.3, 65.7, 60.6, 55.5, 51.6; HRMS (ESI) Calcd. for C<sub>21</sub>H<sub>26</sub>NO<sub>4</sub> [M+H] 356.1862, found 356.1858. Enantiomeric excess was determined to be 98% by chiral HPLC (CHIRALPAK IA, 250 x 4.6 mm (L x I.D.), solvent (isocratic) 95:5 hexanes/2-propanol, flow rate 1.0 mL/min, λ = 230 nm). Retention times: (*S*)-serine derivative 15.97 min; (*R*)-serine derivative 22.34 min.

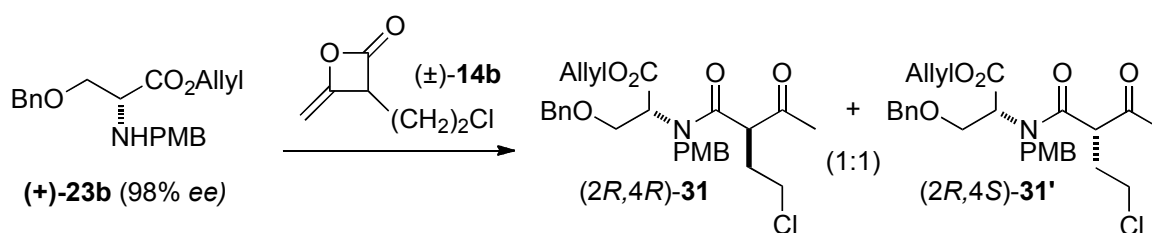

**$\beta$ -Ketoamide, 31/31'.** To a 80 mL microwave vessel containing (*R*)-*O*-benzyl serine allyl ester (+)-**23b** (3.56 g, 0.01 mol, 1.0 equiv) was added ketene-dimer ( $\pm$ )-**14b** (1.61 g, 0.011 mmol, 1.1 equiv), 2-hydroxypyridine (1.05 g, 0.011 mmol, 1.1 equiv) and dichloroethane (35 mL). The reaction mixture was stirred at 23 °C until the solution turned transparent. The reaction vessel was heated to 48 °C and irradiated in the microwave at 100 W for 2 h (same scale reaction was repeated one more time). The reaction mixture was concentrated under reduced pressure, and the residue was purified by a short SiO<sub>2</sub> column (95:5 DCM/EtOAc) to afford a 1:1 mixture of diastereomeric keto amides **31/31'** (8.02 g, 80%) as a colorless oil. Two sequential separations by MPLC (SiO<sub>2</sub>, 5:95 EtOAc/CH<sub>2</sub>Cl<sub>2</sub>) gave 2.30 g (46%) of (*R,R*)-**31** (30:1 dr). Data for (*R,R*)-**31** (45:1 dr, 98% ee): [α]<sup>23</sup><sub>D</sub> = + 66.1 (*c* = 1.0, CHCl<sub>3</sub>); IR (neat) 1739, 1645 cm<sup>-1</sup>; <sup>1</sup>H NMR (500 MHz, CDCl<sub>3</sub>) for major rotamer δ 7.22-7.36 (m, 7H), 6.87 (d, *J* = 9 Hz, 2 H),

5.85-5.93 (m, 1H), 5.24-5.33 (m, 2H), 4.82 (d,  $J = 16.5$  Hz, 1H), 4.66 (d,  $J = 16.5$  Hz, 1H), 4.59-4.61 (m, 2H), 4.50 (dd,  $J = 4.0, 8.5$  Hz, 1H), 4.47 (d,  $J = 12$  Hz, 1H), 4.44 (d,  $J = 12$  Hz, 1H), 4.08 (dd,  $J = 8.5, 10.0$  Hz, 1H), 4.01 (dd,  $J = 3.5, 10.0$  Hz, 1H), 3.93 (dd,  $J = 5.5, 8.5$  Hz, 1H), 3.81 (s, 3H), 3.46-3.58 (m, 2H), 2.34-2.43 (m, 1H), 2.17-2.24 (m, 1H), 2.11 (s, 3H);  $^{13}\text{C}$  NMR (125 MHz,  $\text{CDCl}_3$ ) for major rotamer  $\delta$  203.3, 169.9, 168.5, 164.9, 159.5, 137.8, 131.8, 128.9 (2C), 128.6 (2C), 128.0, 127.9 (2C), 119.1, 114.3 (2C), 73.9, 68.6, 66.3, 60.1, 55.5, 54.8, 52.6, 42.9, 32.1, 28.0; HRMS (ESI) Calcd. for  $\text{C}_{27}\text{H}_{32}\text{ClNO}_6\text{Li}$  [ $\text{M}+\text{Li}$ ] 508.2078, found 508.2073. Enantiomeric excess was determined by chiral HPLC (Chiralpak IA, 250 x 4.6 mm (L x I.D.), solvent (isocratic) 90:10 hexanes/2-propanol, flow rate 1.0 mL/min,  $\lambda = 230$  nm). Retention times: (*R,R*)-**31** 19.34 min; *ent*-**31**(*S,S*): 21.09 min.

For the bis-cyclization process and subsequent steps leading to (–)-salinosporamide A, see the Experimental Section of Article text.

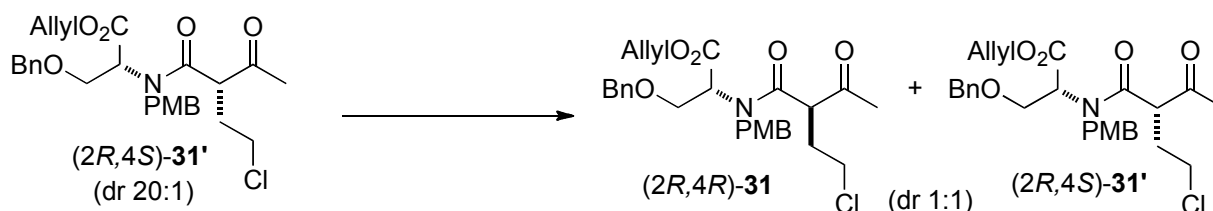

**Epimerization of  $\beta$ -Ketoamide **31'**.** To a solution of ketoamide (*S,R*)-**31'** (0.30 g, 0.598 mmol, ~ 20:1 dr) in 10 mL of EtOAc/MeOH (4:1) was added TsOH (137 mg, 0.718 mmol) and the solution was heated to 45 °C for 48 h. After cooling to room temperature, the reaction mixture was diluted with Et<sub>2</sub>O (150 mL), H<sub>2</sub>O (100 mL) was added and the pH of the aqueous layer was adjusted to ~10 using a 0.1 M NaOH solution. After extraction, the layers were separated and the organic layer was washed with brine (100 mL), dried over MgSO<sub>4</sub>, filtered, and concentrated under reduced pressure to deliver 0.295 g (98 %) of a 1:1 mixture of ketoamides **31/31'** which could be repurified by MPLC to increase material throughput of the desired diastereomer **31**. HPLC analysis of (*R,R*)-ketoamide **31** verified that epimerization only occurred at the  $\beta$ -ketoamide and not the  $\alpha$ -amino acid position under these conditions.

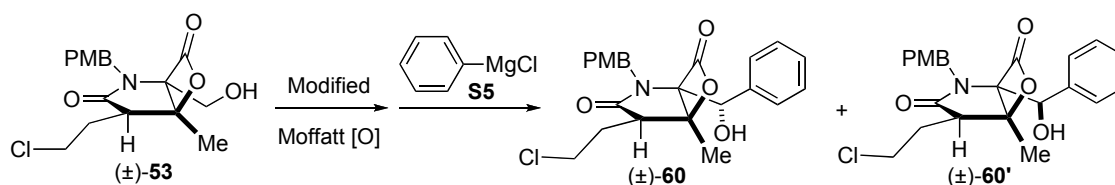

***N*-PMB-phenyl salino A derivative, ( $\pm$ )-**60**.** Aldehyde was prepared according to the representative procedure for the modified Moffatt oxidation from alcohol ( $\pm$ )-**53** (80 mg, 0.218 mmol) in DMSO/toluene (1.2 mL/1.2 mL), and addition of EDCI (208 mg, 1.09 mmol), followed by dichloroacetic acid (10  $\mu\text{L}$ ,

0.109 mmol) at 23 °C for 5 h. The crude aldehyde was used in the subsequent step without further purification.

To a solution of aldehyde (0.109 mmol) in THF at -78 °C, phenyl Grignard (**S5**, 0.164 mmol) in THF was added slowly down the side of the flask. The reaction mixture was warmed to 0 °C for 10 min, quenched with NH<sub>4</sub>Cl saturated solution, and diluted with ether (100 mL). The organic layer was then washed with brine, dried over MgSO<sub>4</sub> and concentrated. The residue was purified by flash chromatography (95:5 → 85:15 EtOAc/hexanes) to provide a mixture of diastereomeric alcohols (±)-**60/60'** (22.5 mg, 48 %, dr = 3:1, 500 MHz <sup>1</sup>H NMR) as a colorless oil, which was carried directly to the next step without further purification.

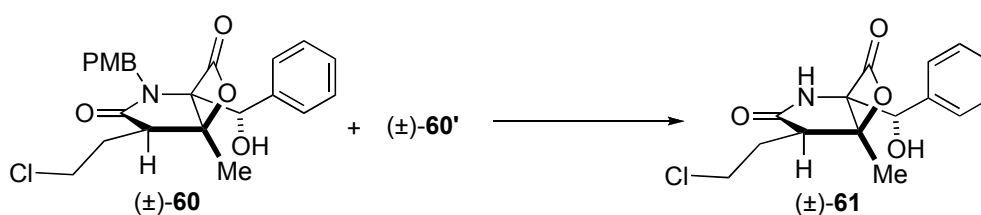

***rac*-Phenyl salinosporamide A derivative, (±)-61.** Prepared according to the representative procedure for PMB deprotection using a diastereomeric mixture of alcohols (±)-**60/60'** (22 mg, 0.052 mmol, dr = 3:1) in *i*-PrOH (0.3 mL), an aqueous solution of CAN (285 mg, 0.52 mmol) in H<sub>2</sub>O (0.1 mL) at 0 °C. The residue was purified by flash chromatography (5:95 to 15:85 EtOAc/CH<sub>2</sub>Cl<sub>2</sub>) to give β-lactone (±)-**61** (7.2 mg, 45 %, dr >19:1) as a white solid. Data matched that previously reported.<sup>4</sup> Data not previously reported: R<sub>f</sub> = 0.48 (5:95 EtOAc/CH<sub>2</sub>Cl<sub>2</sub>); IR (neat) 3354, 1829, 1705 cm<sup>-1</sup>; HRMS (ESI) Calcd. for C<sub>15</sub>H<sub>17</sub>ClNO<sub>4</sub> [M+H] 310.0848, found 310.0858. Crystals suitable for X-ray analysis were obtained by slow recrystallization from ~10% acetone/hexane at ambient temperature (23 °C).

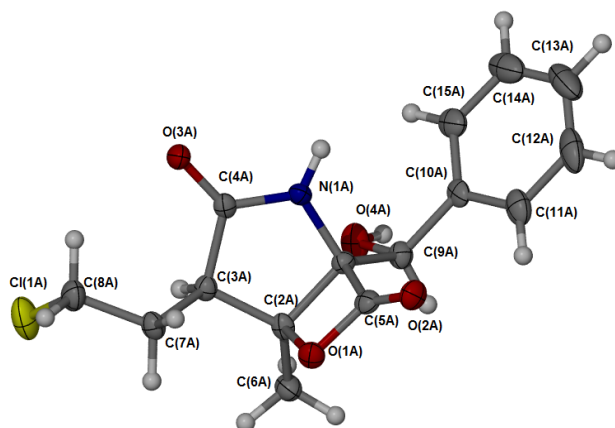

**Figure 1.** ORTEP plot of the X-ray structure of *rac*-phenyl salinosporamide A, (±)-**61**

<sup>4</sup> Nett, M.; Gulder, T. A. M.; Kale, A. J.; Hughes, C. C.; Moore, B. S. *J. Med. Chem.* **2009**, *52*, 6163–6167.

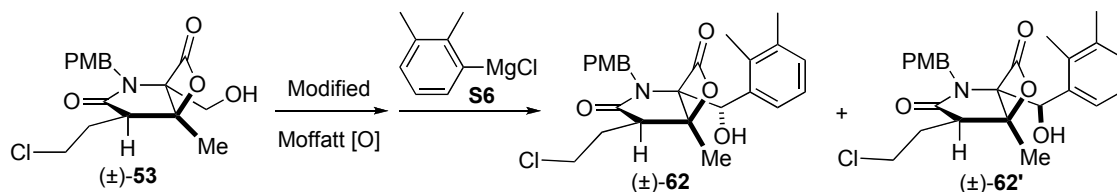

***N*-PMB-Dimethylphenylsalino A derivative, (±)-62.** Aldehyde was prepared according to the representative procedure for the modified Moffatt oxidation from alcohol (±)-**53** (80 mg, 0.218 mmol) in DMSO/toluene (1.2 mL/1.2 mL), and addition of EDCI (208 mg, 1.09 mmol), followed by dichloroacetic acid (10  $\mu$ L, 0.109 mmol) at 23 °C for 5 h. A portion of this crude aldehyde was used in the subsequent step without further purification.

To a solution of aldehyde ( $\sim$ 0.109 mmol,  $\sim$  half of aldehyde prepared above) in THF at -78 °C, Grignard reagent **S6** (0.164 mmol) in THF was added slowly down the side of the flask. The reaction mixture was then warmed up to 0 °C for 10 min, quenched with  $\text{NH}_4\text{Cl}$  saturated solution, and diluted with ether (100 mL). The organic layer was then washed with brine, dried over  $\text{MgSO}_4$  and concentrated. The residue was purified by flash chromatography (95:5  $\rightarrow$  85:15 EtOAc/hexanes) to provide a mixture of (±)-**62**/(±)-**62'** (22.0 mg, 44 %, dr = 3:1 according to 500 MHz  $^1\text{H}$  NMR) as a colorless oil, which was carried directly to the next step without further purification.

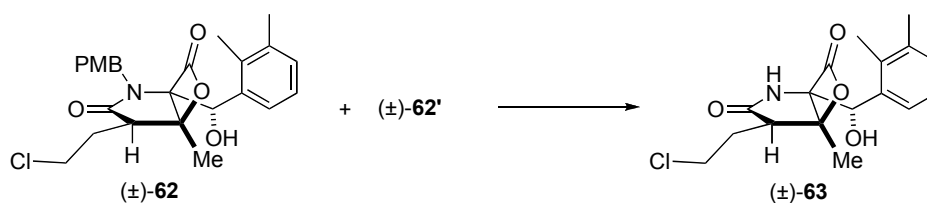

***rac*-Dimethylphenylsalinosporamide A derivative, (±)-63.** Prepared according to the representative procedure for PMB deprotection using a mixture of alcohol (±)-**62**/(±)-**62'** (22.0 mg, 0.048 mmol, dr 3:1) in *i*-PrOH (0.3 mL) and an aqueous solution of CAN (263 mg, 0.48 mmol) in  $\text{H}_2\text{O}$  (0.1 mL) at 0 °C dropwise. The residue was purified by flash chromatography (5:95  $\rightarrow$  15:85 EtOAc/ $\text{CH}_2\text{Cl}_2$ ) to give dimethyl phenyl salino A derivative (±)-**63** (6.9 mg, 43 %, dr >19:1) as a white solid:  $R_f$  = 0.55 (4:6 EtOAc/Hexanes); IR (neat) 3350, 1825, 1702  $\text{cm}^{-1}$ ;  $^1\text{H}$  NMR (500 MHz,  $\text{CDCl}_3$ )  $\delta$  7.82 (d,  $J$  = 7.5, 1H), 7.21-7.28 (m, 2H), 5.44 (s, 1H), 5.24 (d,  $J$  = 4.5 Hz, 1H), 3.98 (ddd,  $J$  = 5.0, 8.0, 11.0 Hz, 1H), 3.78 (ddd,  $J$  = 5.0, 7.0, 11.5 Hz, 1H), 2.91 (t,  $J$  = 7.0 Hz, 1H), 2.33 (s, 3H), 2.26-2.32 (m, 1H), 2.27 (s, 3H), 2.14-2.21 (m, 1H), 2.16 (d,  $J$  = 4.5 Hz, 1H), 2.0 (s, 3H);  $^{13}\text{C}$  NMR (125 MHz,  $\text{CDCl}_3$  and  $\text{C}_3\text{D}_6\text{O}$ )  $\delta$  174.9, 167.6, 138.0, 135.9, 134.7, 131.3, 127.2, 124.8, 84.5, 78.8, 67.6, 45.3, 42.3, 28.2, 21.0, 19.1, 15.2; HRMS (ESI) Calcd. for  $\text{C}_{17}\text{H}_{21}\text{ClNO}_4$ [M+H] 338.1159, found 338.1152.



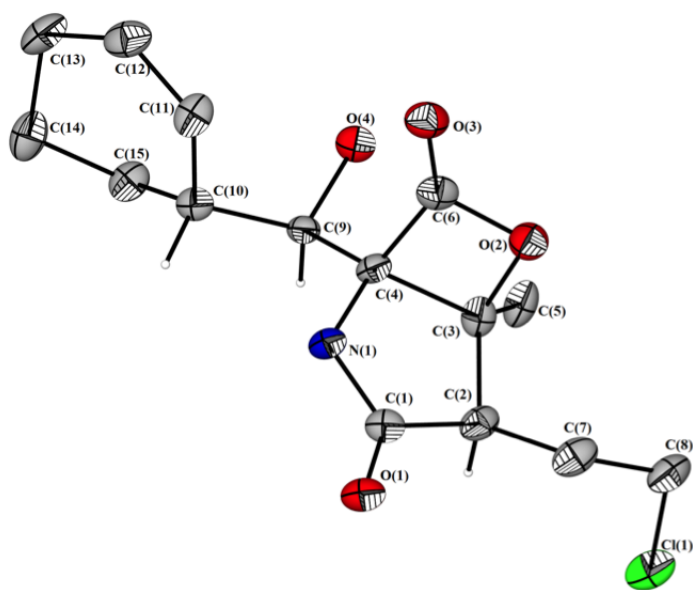

**Figure 2.** ORTEP plot of the X-ray structure of C5, C6-bis-*epi*-salinosporamide A (**1a'**)

salinoAminordiast2

File: xp

Pulse Sequence: s2pul

Solvent: cdcl3

Ambient temperature

Operator: nguyenvn

INOVA-500 \*inova500\*

Relax. delay 1.000 sec

Pulse 45.0 degrees

Acq. time 2.049 sec

Width 7996.8 Hz

320 repetitions

OBSERVE H1, 499.7830944 MHz

DATA PROCESSING

Resol. enhancement -0.0 Hz

FT size 65536

Total time 51 min, 4 sec

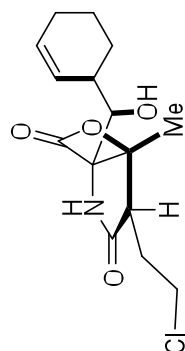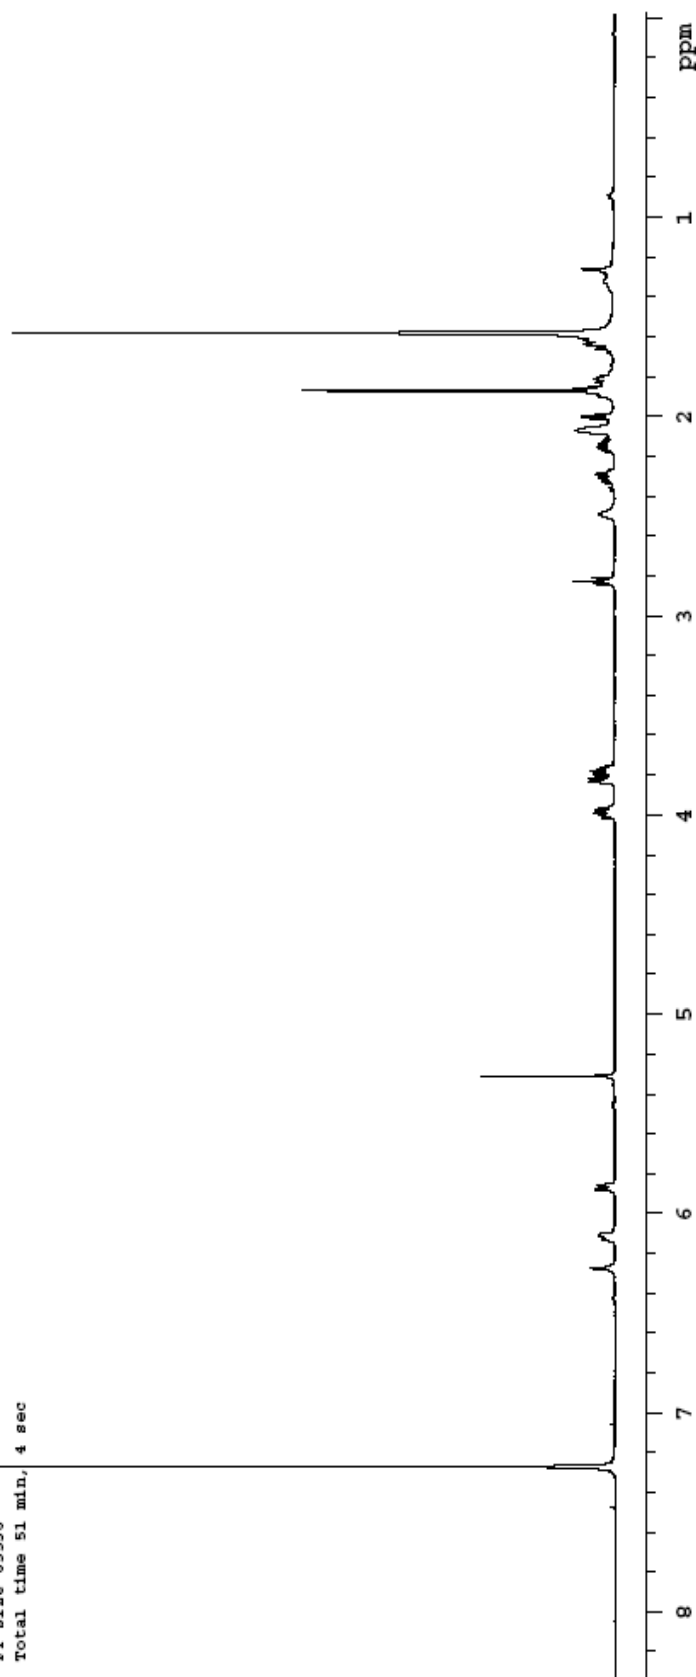

<sup>1</sup>H NMR of  $\beta$ -lactone, (-)-**1a'** (500 MHz, CDCl<sub>3</sub>)

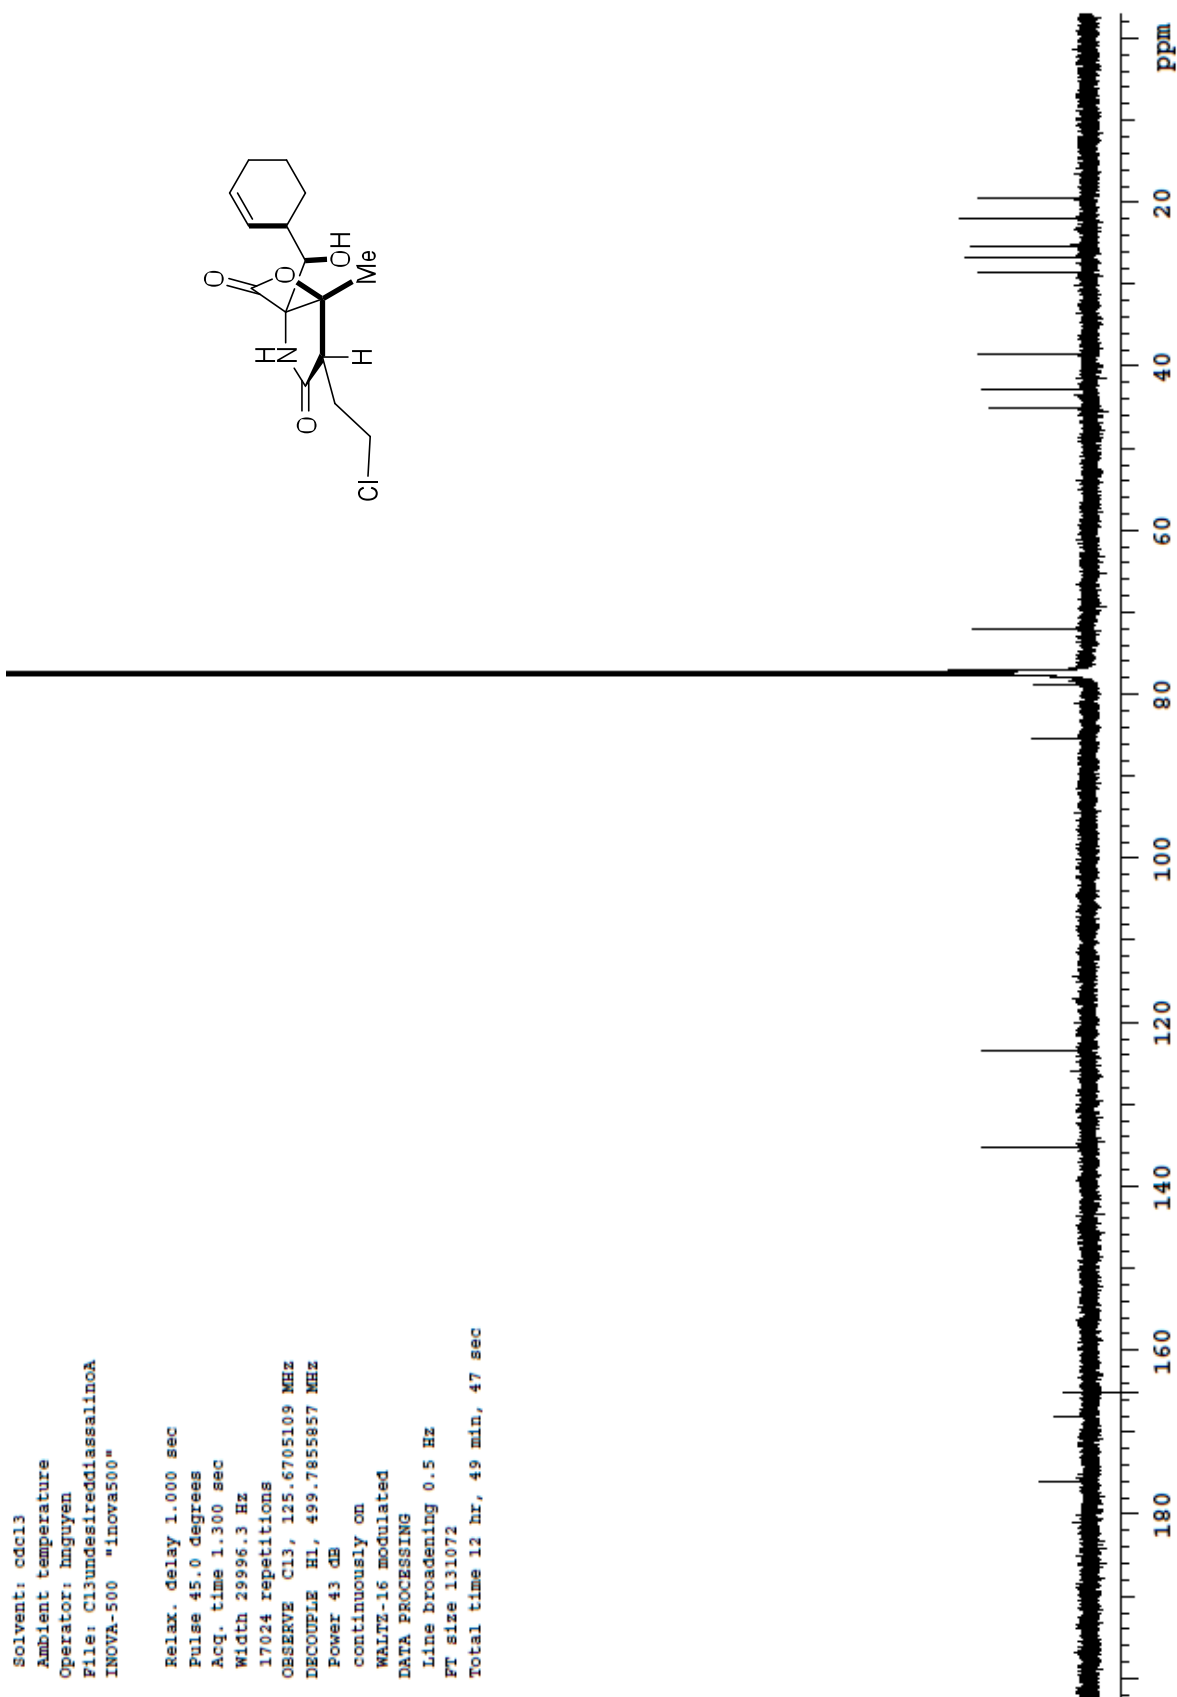

$^{13}\text{C}$  NMR of  $\beta$ -lactone, C5, C6-bis-*epi*-salinosporamide A ((-)-**1a'**) (500 MHz,  $\text{CDCl}_3$ )

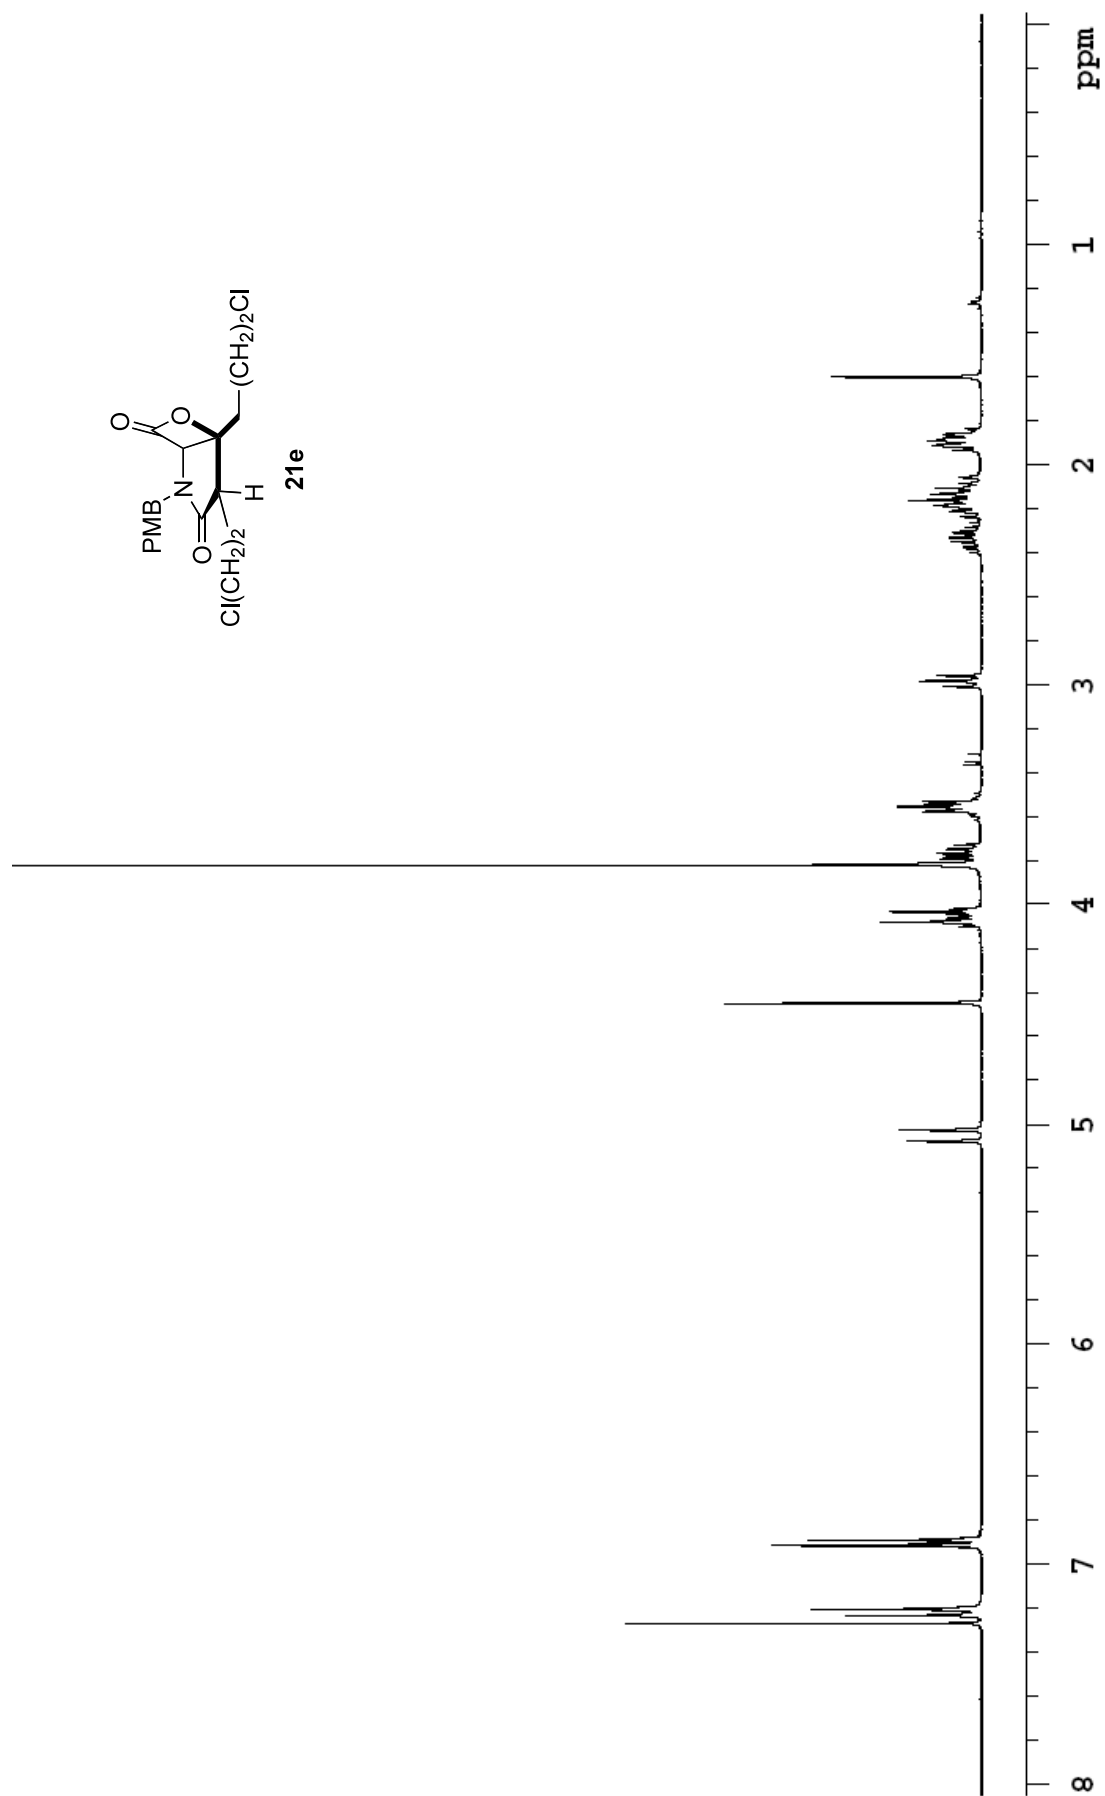

$^1\text{H NMR}$  of  $\beta$ -lactone, ( $\pm$ )-**21e** (500 MHz,  $\text{CDCl}_3$ )

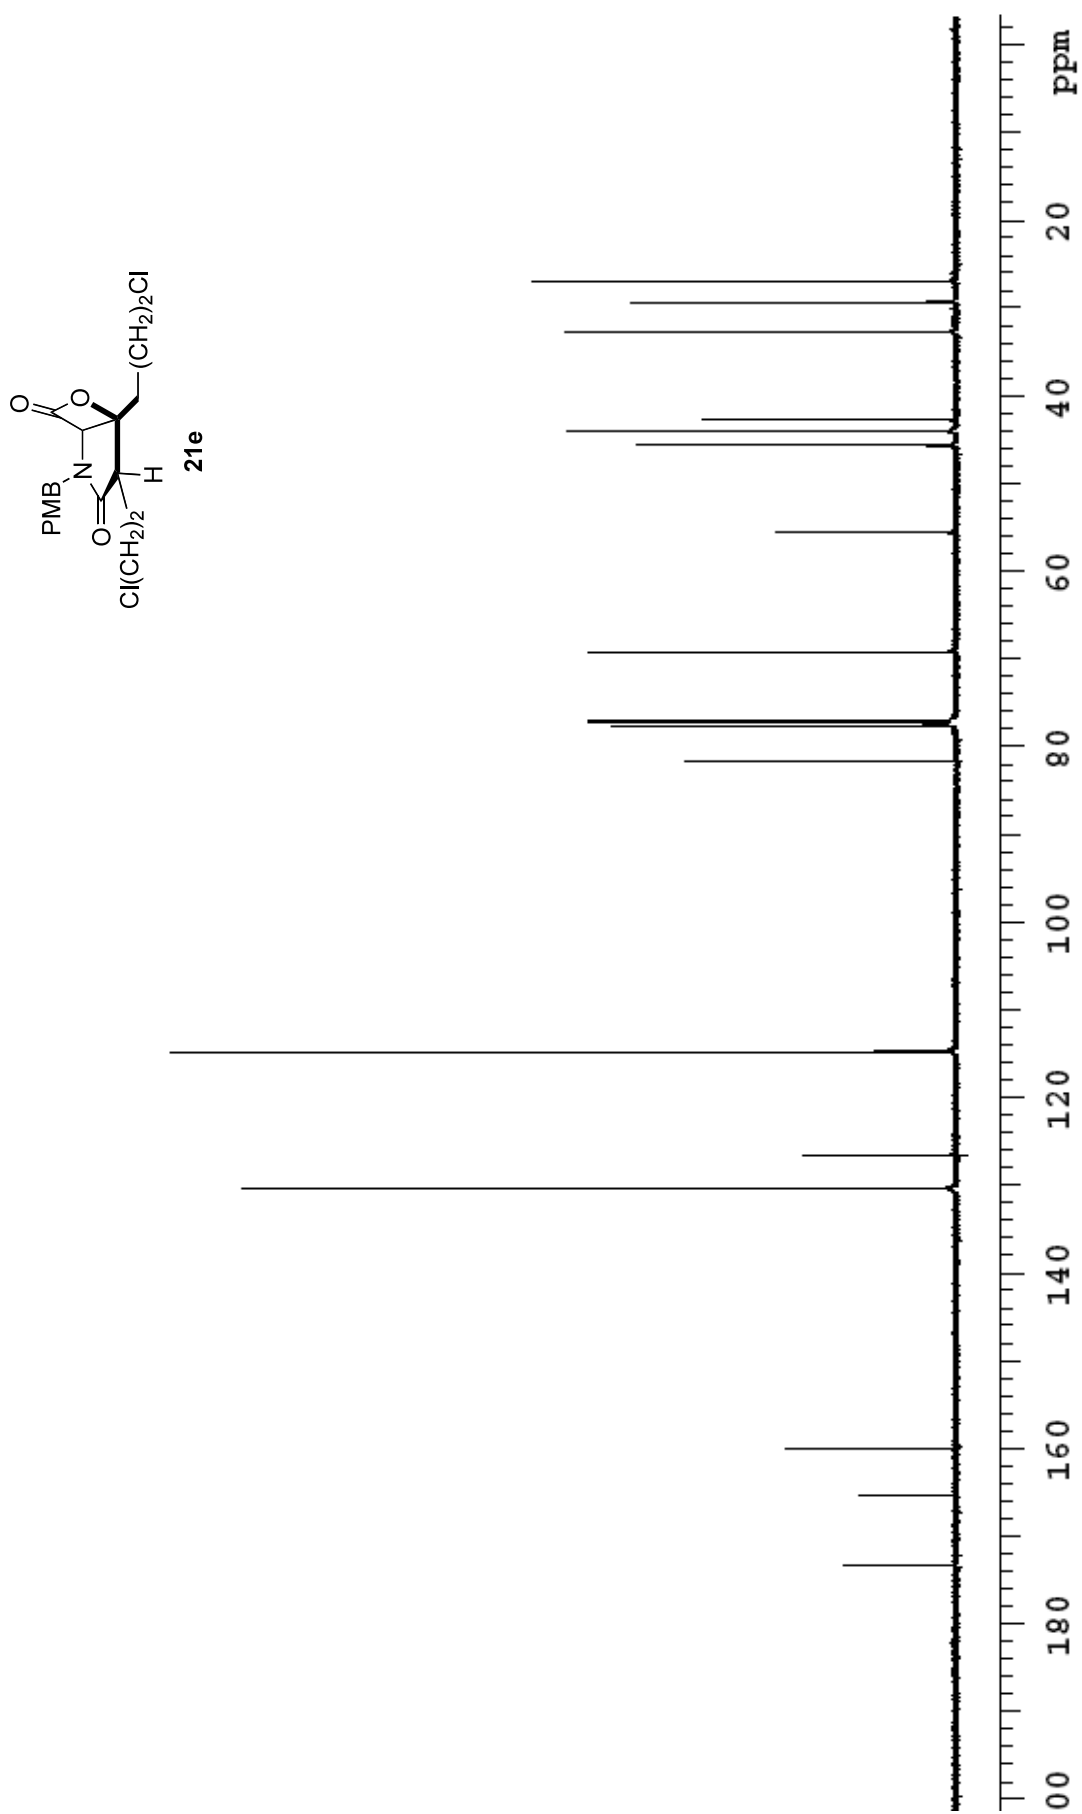

<sup>13</sup>C NMR of β-lactone, (±)-**21e** (125 MHz, CDCl<sub>3</sub>)

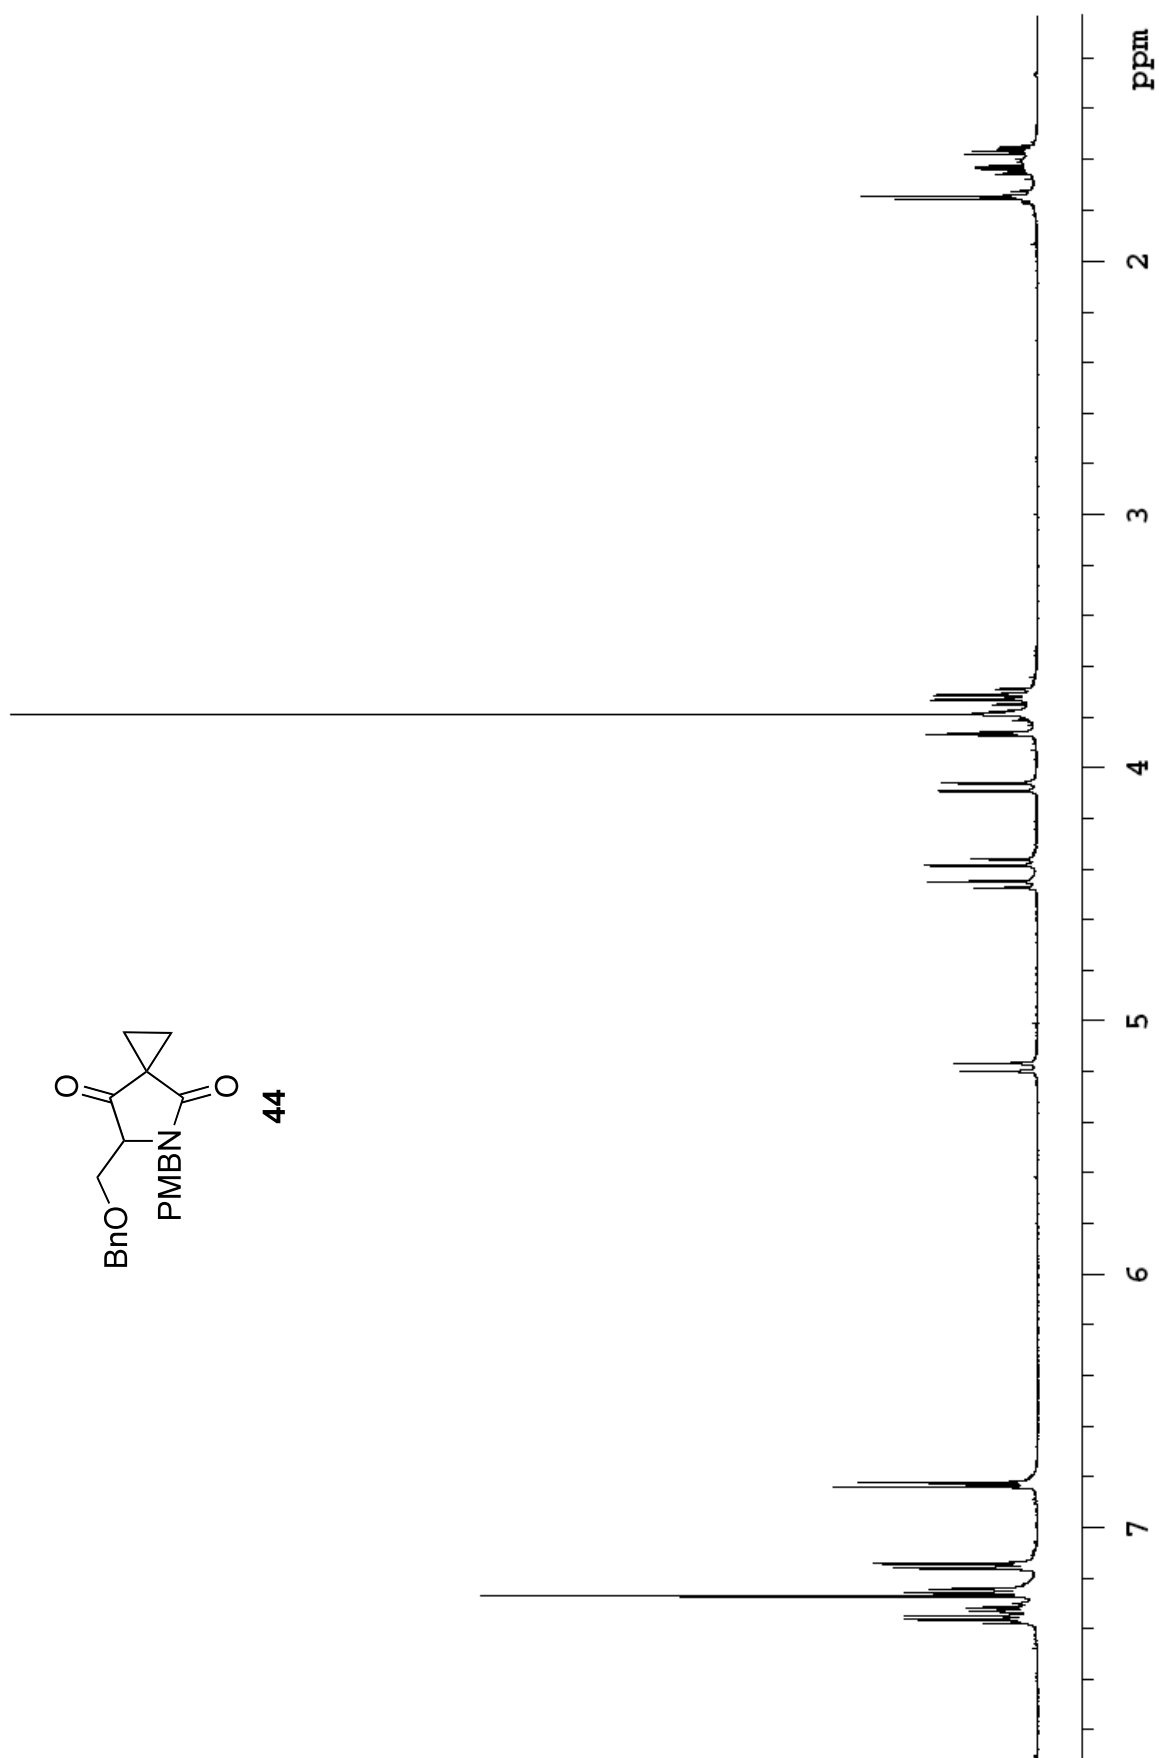

<sup>1</sup>H NMR of Cyclopropyl Ketoamide **44** (500 MHz, CDCl<sub>3</sub>)

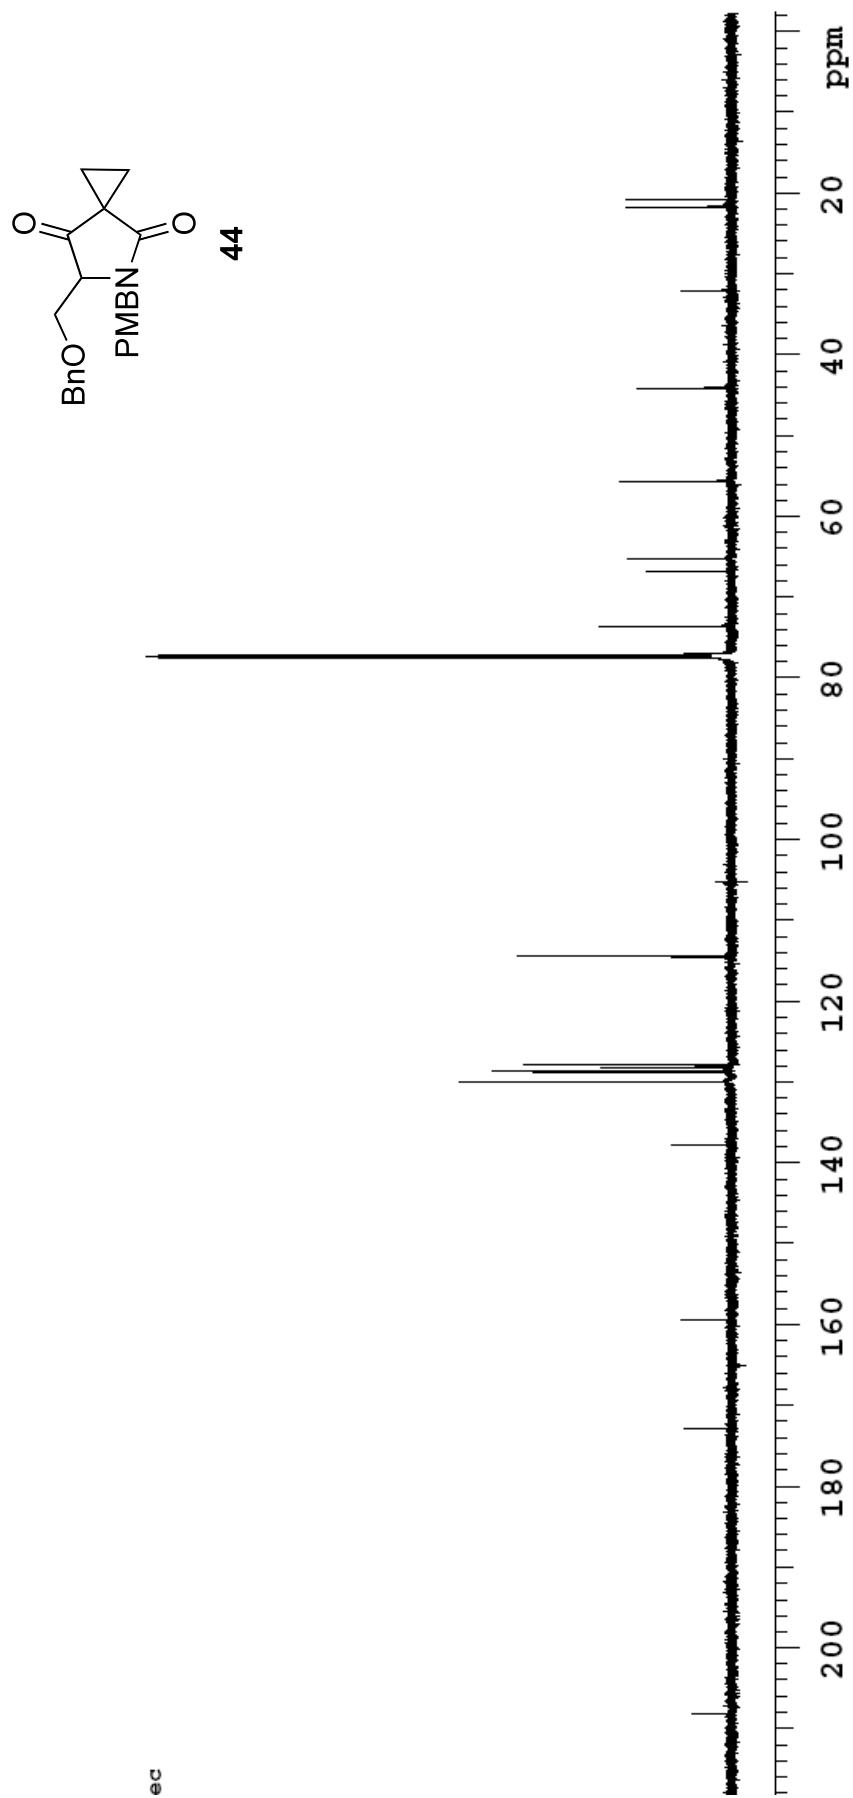

<sup>13</sup>C NMR of Cyclopropyl Ketoamide **44** (125 MHz, CDCl<sub>3</sub>)

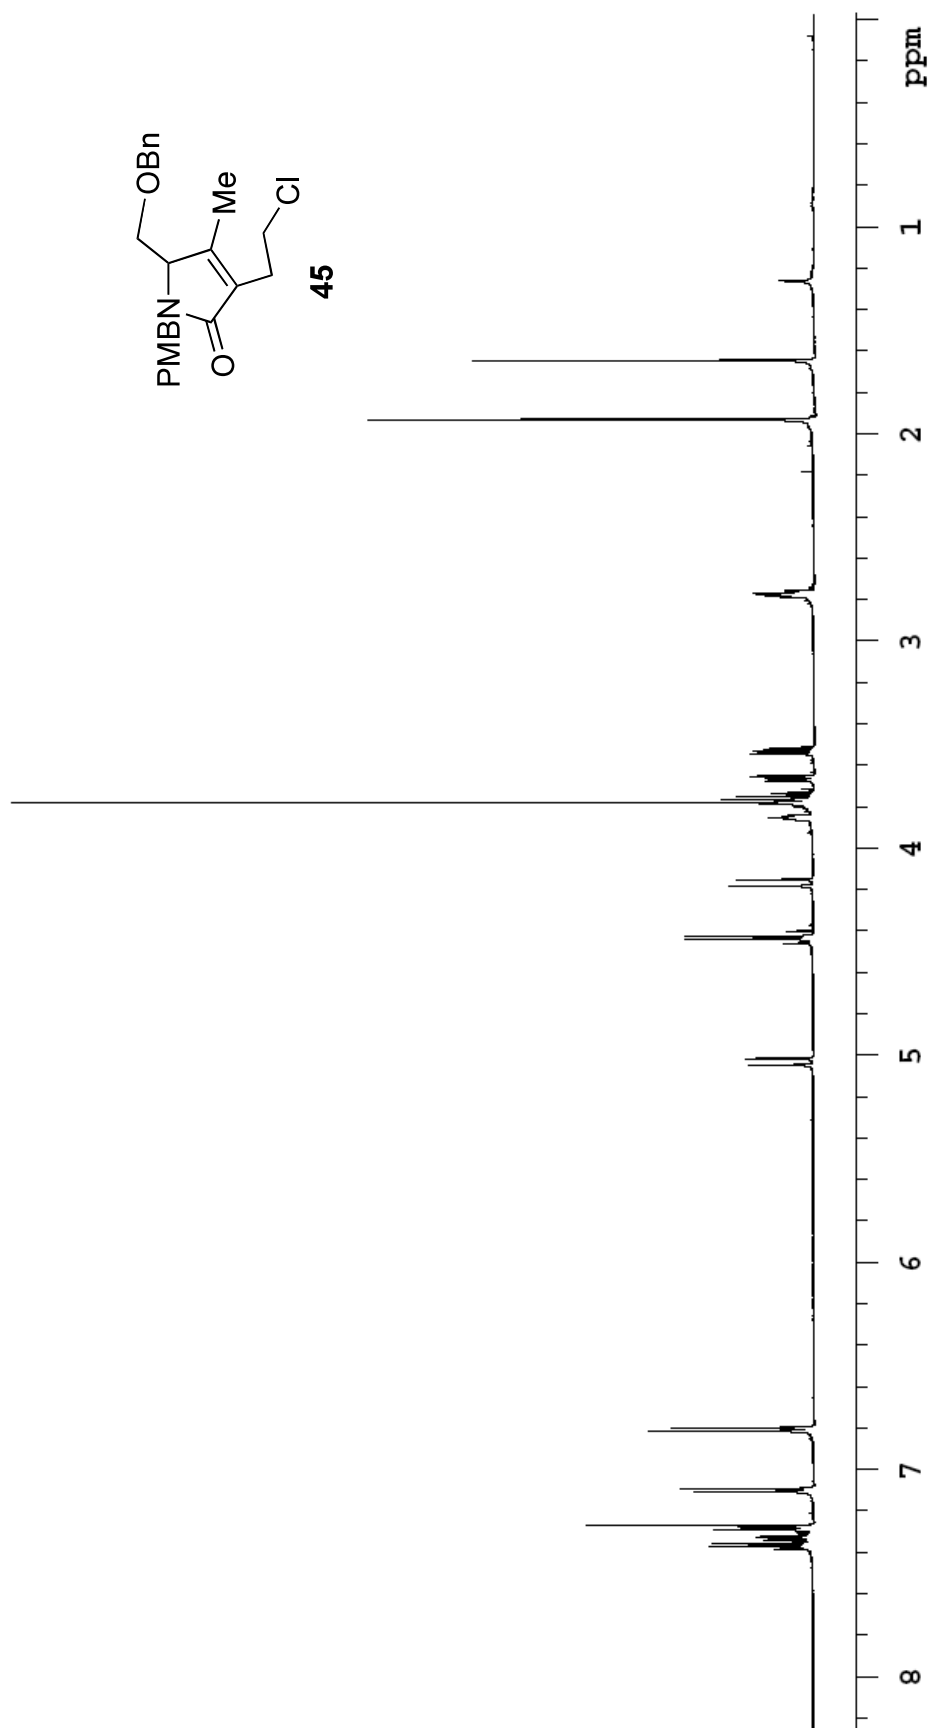

$^1\text{H}$  NMR of  $\gamma$ -Lactam **45** (500 MHz,  $\text{CDCl}_3$ )



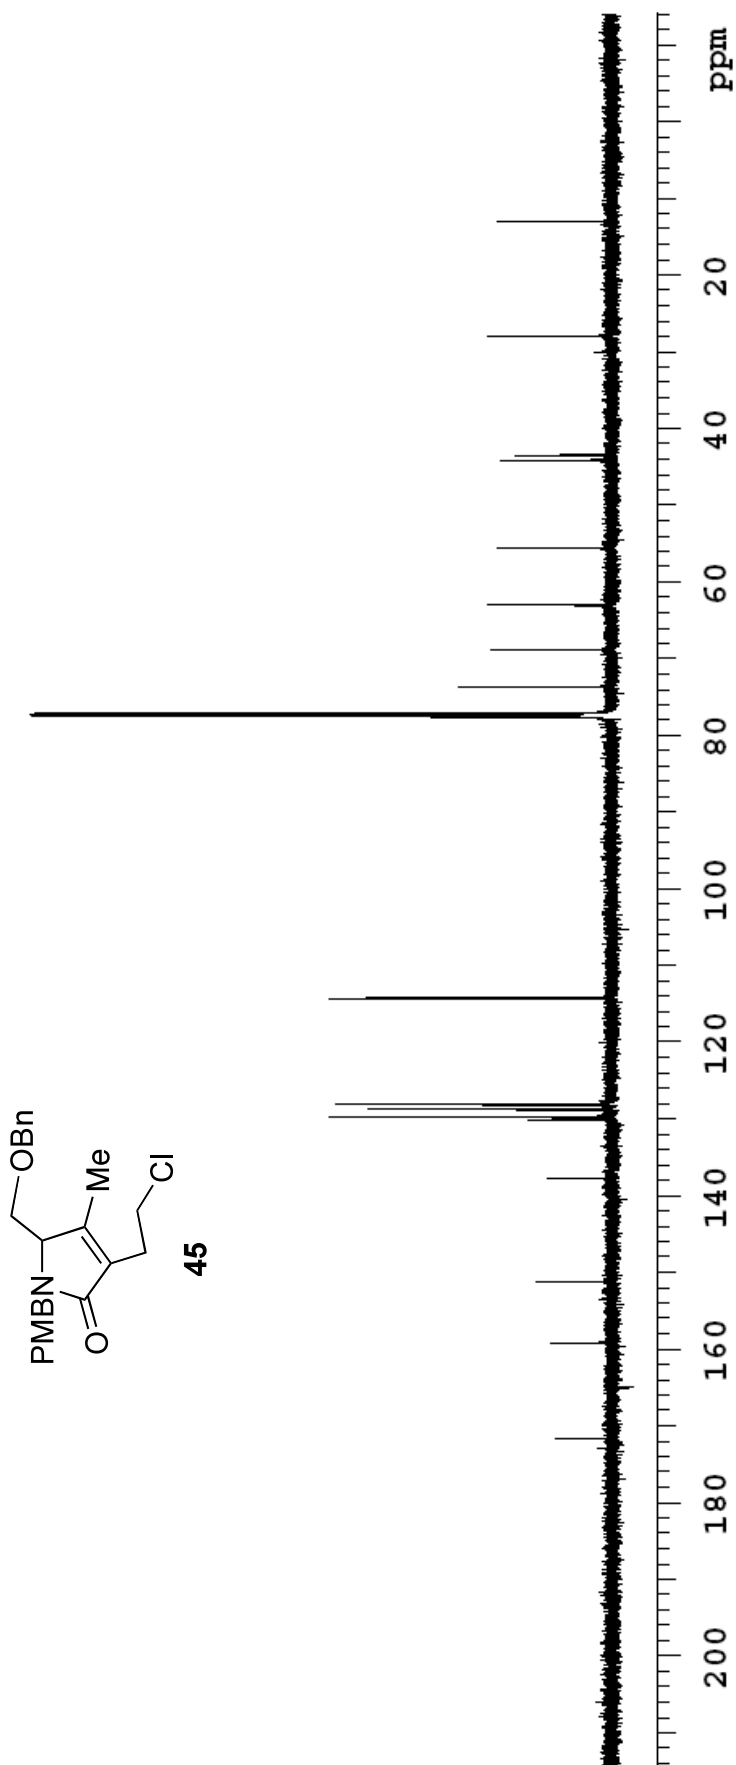

$^{13}\text{C}$  NMR of  $\gamma$ -Lactam **45** (125 MHz,  $\text{CDCl}_3$ )

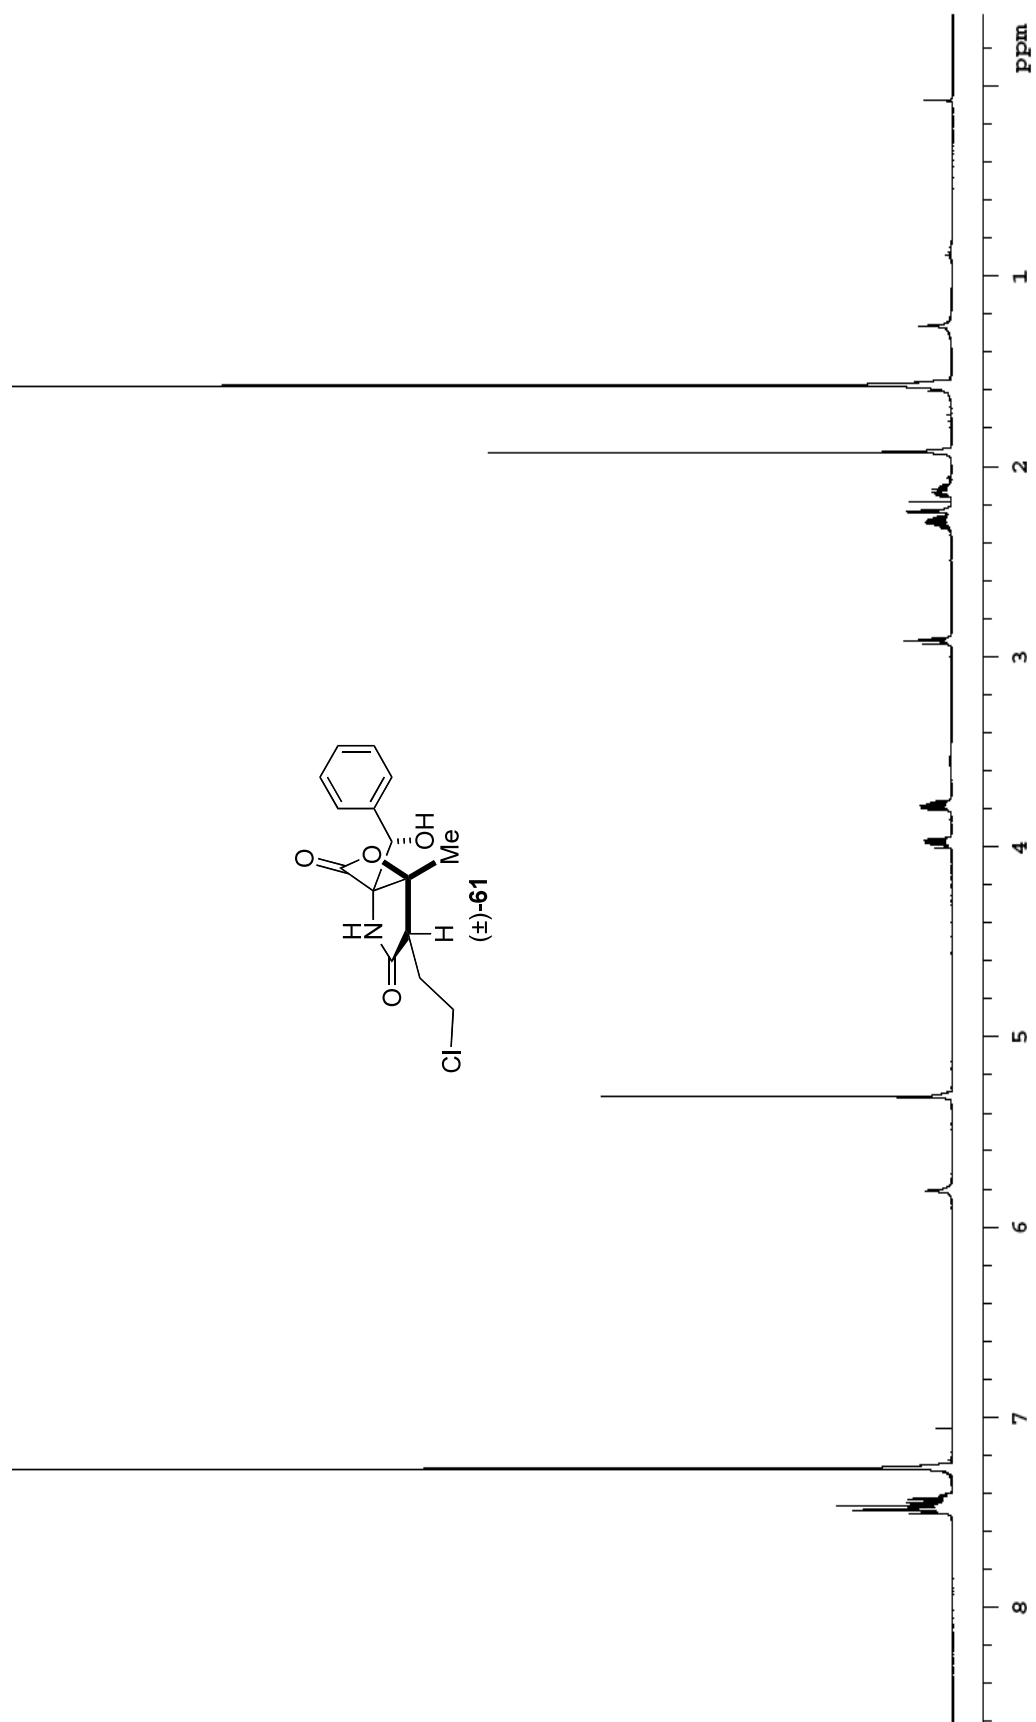

$^1\text{H}$  NMR of  $(\pm)$ -salino A derivative,  $(\pm)$ -**61** (500 MHz,  $\text{CDCl}_3$ )

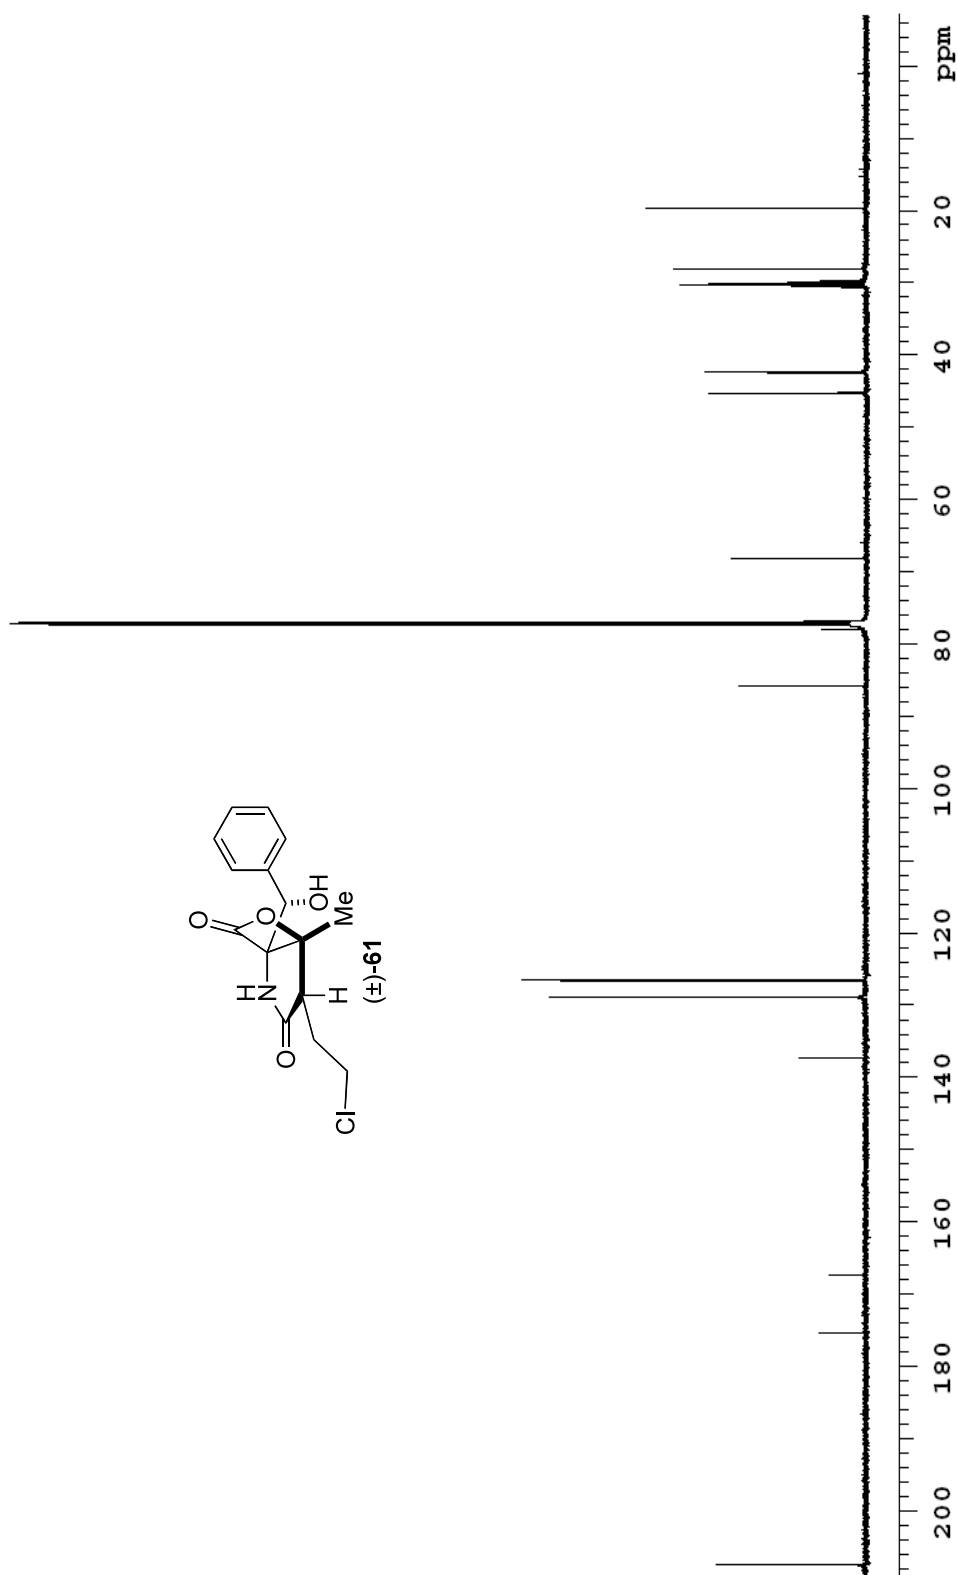

$^{13}\text{C}$  NMR of  $(\pm)$ -salino A derivative,  $(\pm)$ -**61** (125 MHz, CDCl<sub>3</sub>)

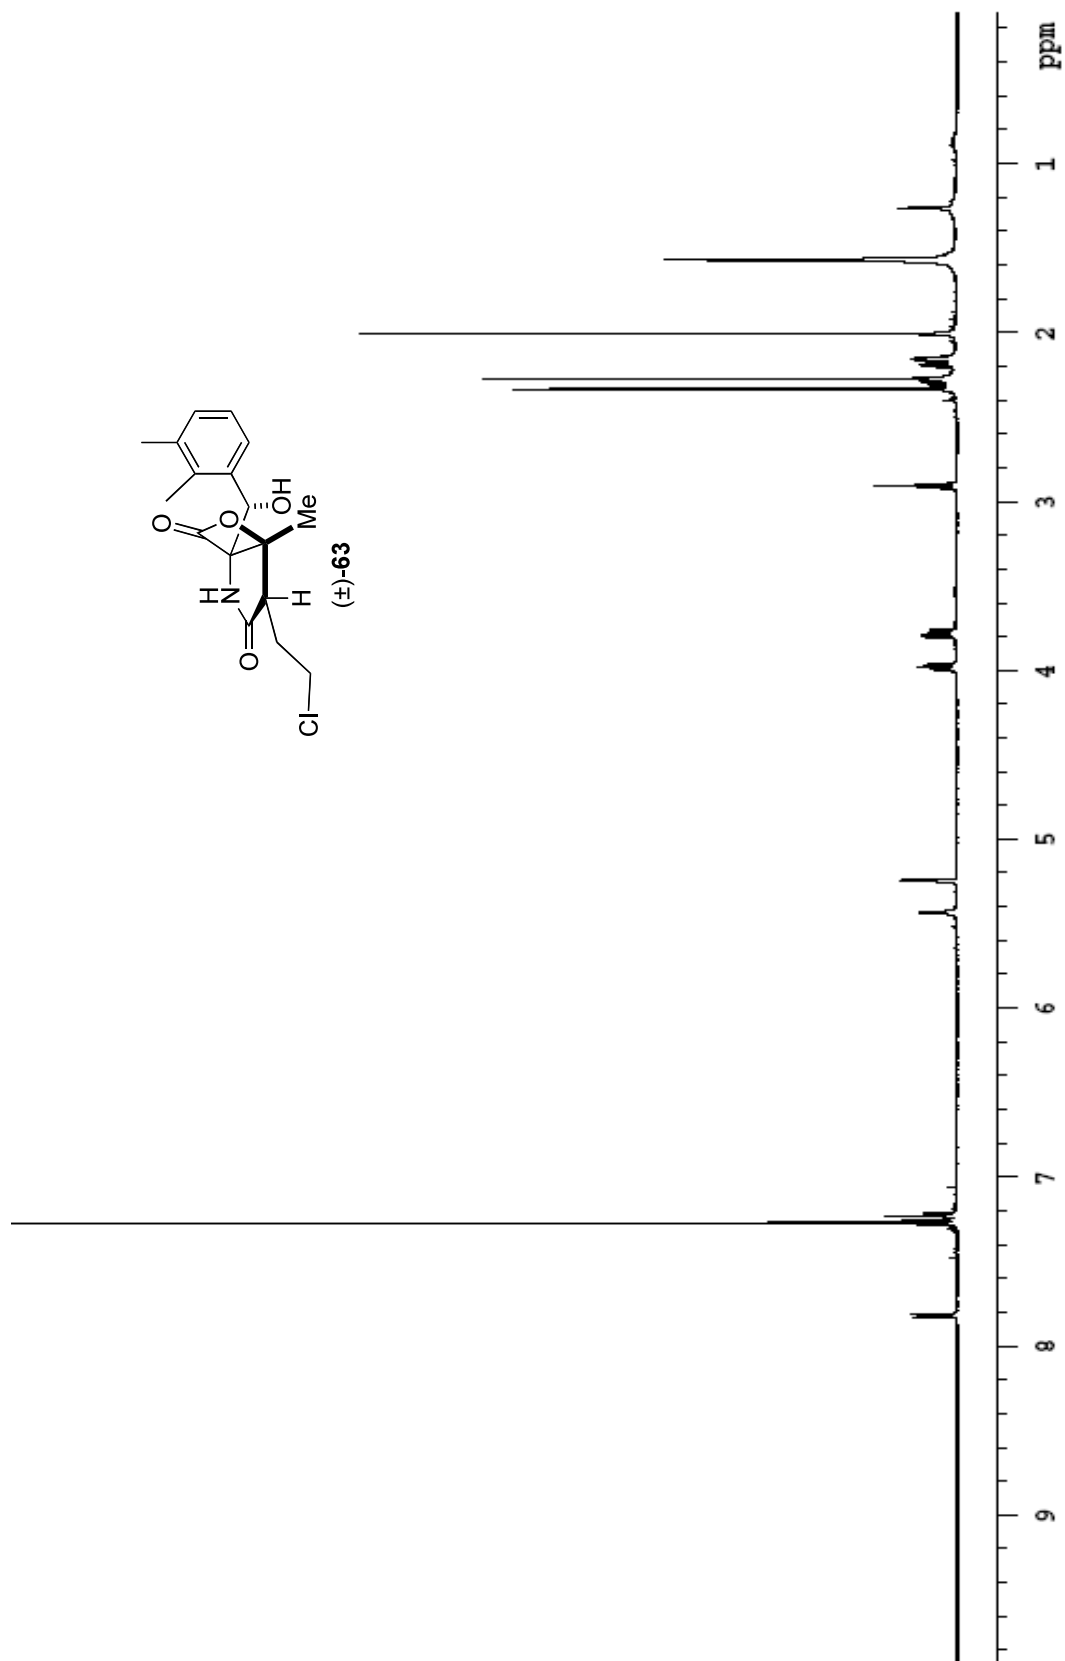

<sup>1</sup>H NMR of (±)-salino A derivative, (±)-**63** (500 MHz, CDCl<sub>3</sub>)

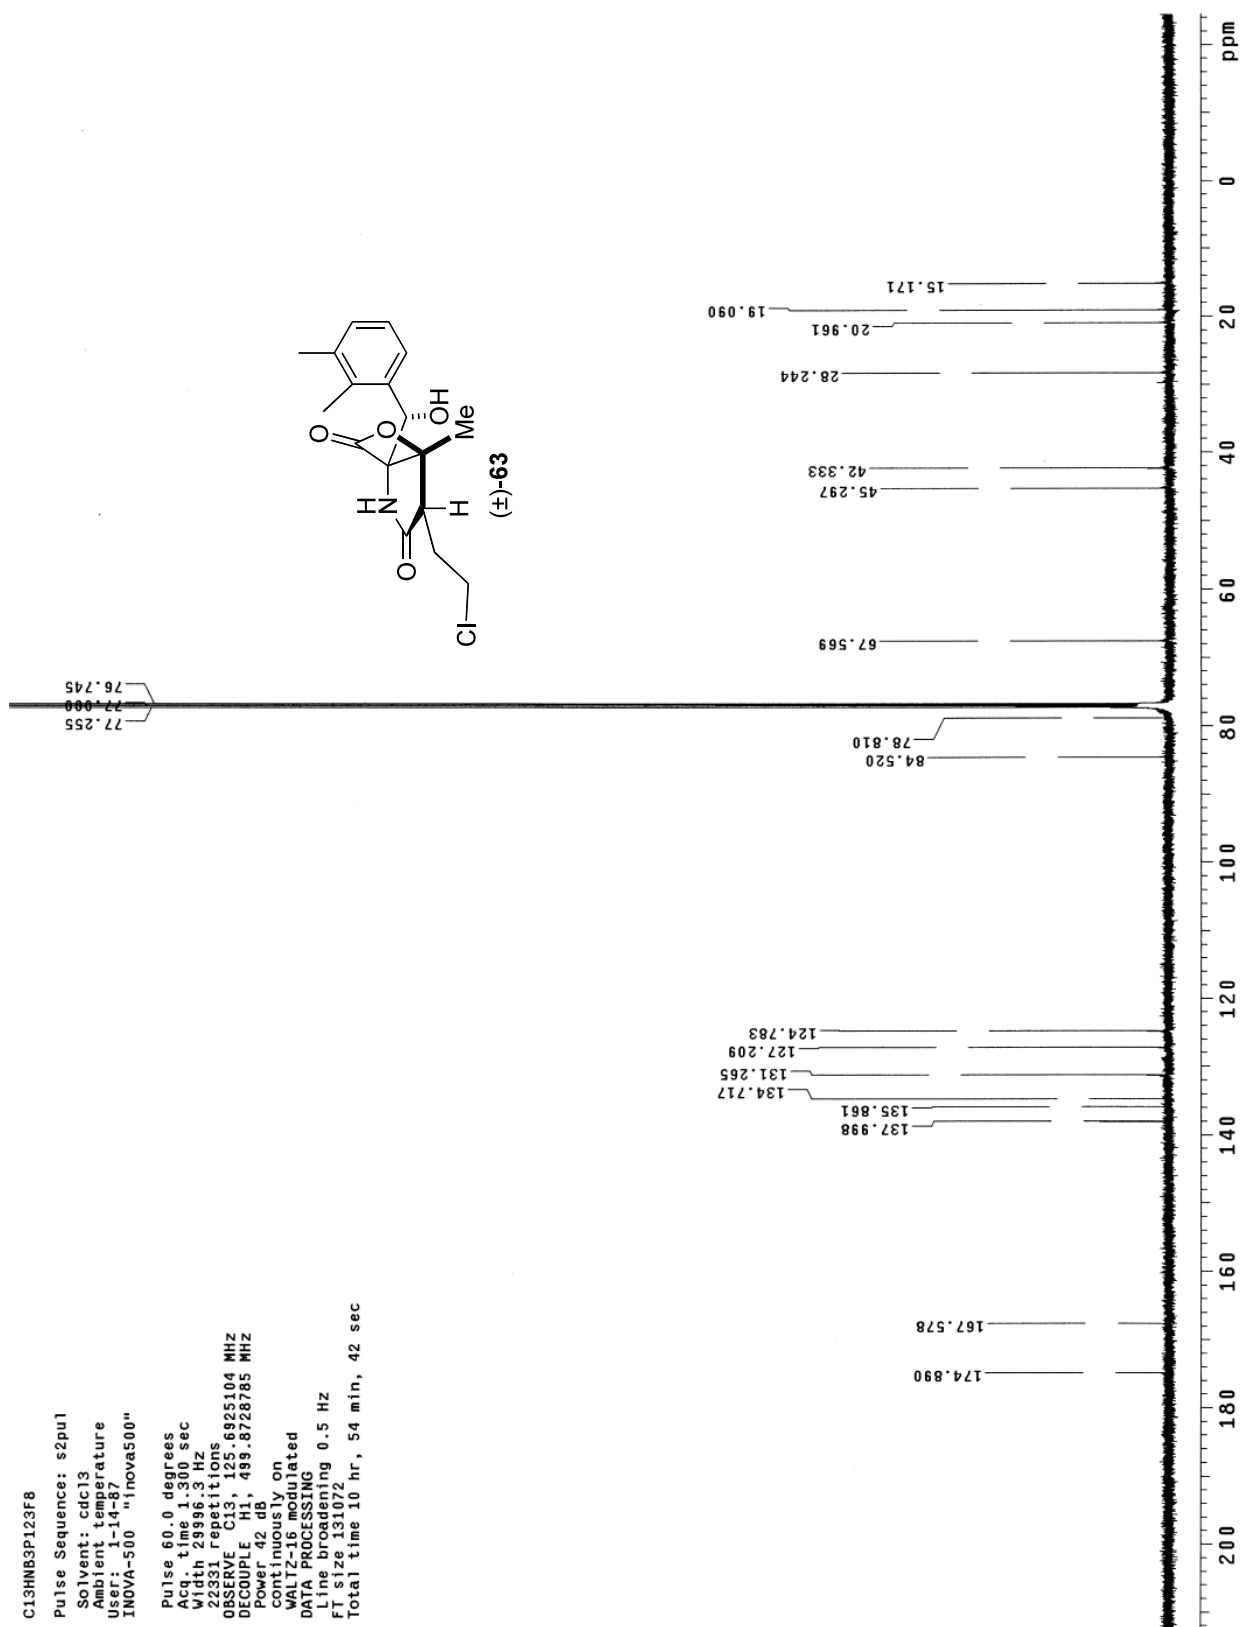

$^{13}\text{C}$  NMR of ( $\pm$ )-salino A derivative, ( $\pm$ )-**63** (125 MHz,  $\text{CDCl}_3$ )
